# Supplementary material for: Pencil Lead Diameter Interacts with “Bubble” Shape on Multiple-Choice Completion Time: A Replication and Extension
Source: Research Square preprint supplement (doi:10.21203/rs.3.rs-6874326/v1), 2025-12-18
Supplement: Supplementary file 1 [file 139334ebc8e2f9e948e80651.xlsx]

## Sheet: DATA
small	medium	large	form	Gender	Handedness	Order
00:04:23.150000	00:04:08.330000	00:02:14.960000	1	2		5
00:04:17.250000	00:04:33.280000	00:02:21.670000	1	2		1
00:05:25.890000	00:04:46.630000	00:04:06.800000	1	1		4
00:02:47.330000	00:03:00.330000	00:02:15.340000	1	2		4
00:08:19.830000	00:06:55.890000	00:04:45.320000	1	2	1	2
00:05:35.920000	00:03:25.740000	00:02:28.900000	1	2	1	2
00:08:27.190000	00:05:02.330000	00:03:57.700000	1	2	1	4
00:04:28.720000	00:03:37.810000	00:03:39.930000	1	2	2	4
00:02:46.970000	00:02:37.020000	00:02:23.070000	1	2	1	2
00:06:03.700000	00:04:17.990000	00:04:13.450000	1	2	1	6
00:03:27.570000	00:03:10.990000	00:03:00.270000	1	2	1	1
00:04:27.770000	00:03:43.930000	00:02:30.280000	1	2	1	5
00:01:50.730000	00:02:15.410000	00:02:15.010000	1	2	1	6
00:04:53.290000	00:02:36.280000	00:02:36.780000	1	2	1	2
00:03:56.320000	00:04:59.540000	00:03:34.690000	1	2	1	5
00:02:14.310000	00:01:46.920000	00:01:33.460000	1	2	1	6
00:02:53.760000	00:03:51.720000	00:04:25.130000	2	1		4
00:03:10.530000	00:02:53.800000	00:02:38.800000	2	2		1
00:02:02.080000	00:02:58.260000	00:03:00.790000	2	2		3
00:03:03.100000	00:02:51.880000	00:02:50.620000	2	2		6
00:04:08.170000	00:02:46.790000	00:02:30.950000	2	1		2
00:02:19.900000	00:03:24.350000	00:02:30.790000	2	1	1	3
00:01:54.590000	00:01:51.120000	00:02:00.690000	2	2	1	1
00:03:02.620000	00:02:14.870000	00:01:52.800000	2	1	2	2
00:02:12.590000	00:01:40.120000	00:01:29.190000	2	2	1	4
00:03:28.790000	00:03:46.480000	00:03:13.910000	2	2	1	3
00:02:33.490000	00:02:05.900000	00:01:41.120000	2	2	1	3
00:02:36.900000	00:03:44.850000	00:03:08.550000	2	2	1	6

## Sheet: Variable Names
VarName	Label	Values
small	0.5mm	None
medium	0.9 mm	None
large	ScanTek	None
form	Response Form	1 = Bubble Sheet; 2 = ScanTron
Gender	Participant Gender	1 = Male; 2 = Female
Handedness	Participant Dominant Hand	1 = Right Handed; 2 = Left Handed
Order	Pencil Order	1 = S-M-L; 2 = S-L-M; 3 = M-L-S; 4 = L-M-S; 5 = M-S-L; 6 = L-S-M
